# Supplementary figures and images for: The Small-Molecule Inhibitor MRIA9 Reveals Novel Insights into the Cell Cycle Roles of SIK2 in Ovarian Cancer Cells
Source: MDPI journal article supplement (doi:10.3390/cancers13153658), 2021-07-21

Figure S1

A

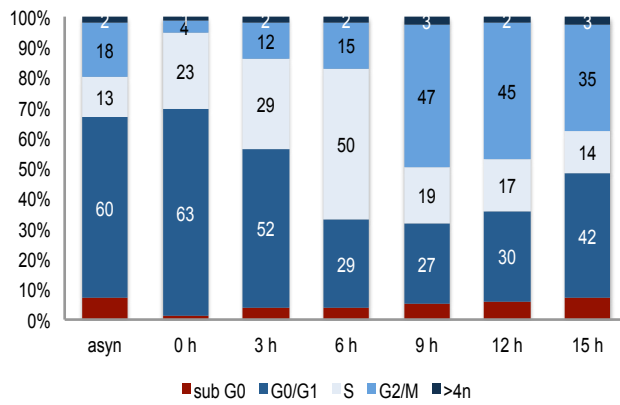

B

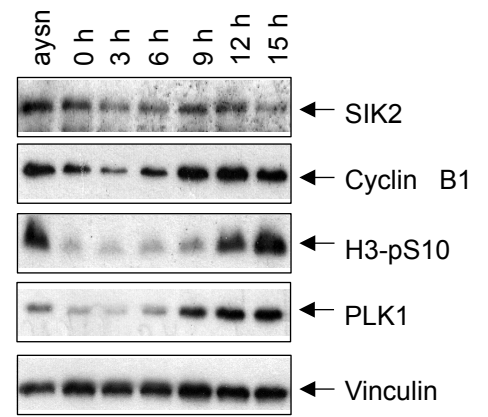

C

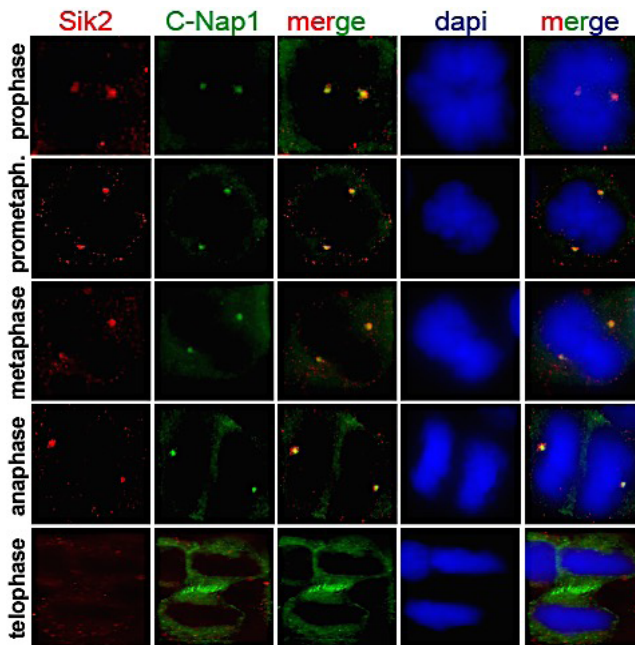

D

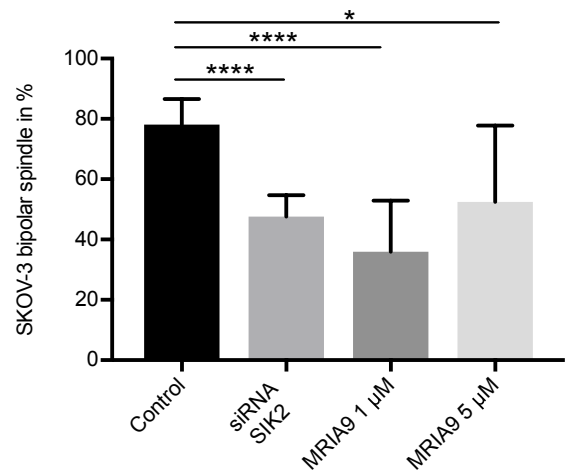

Supplement: s1 [file s1]

A

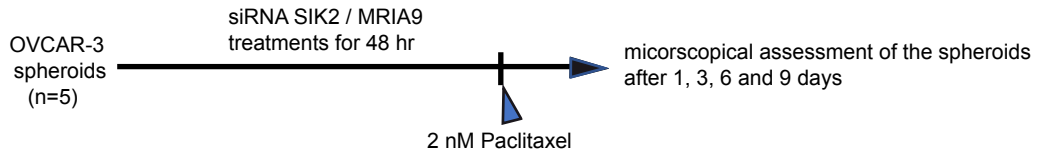

B

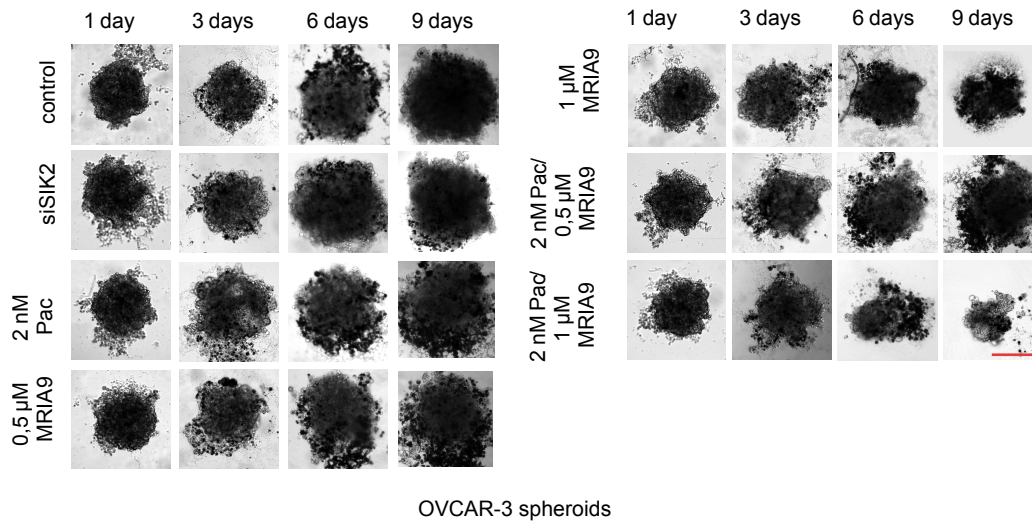

C

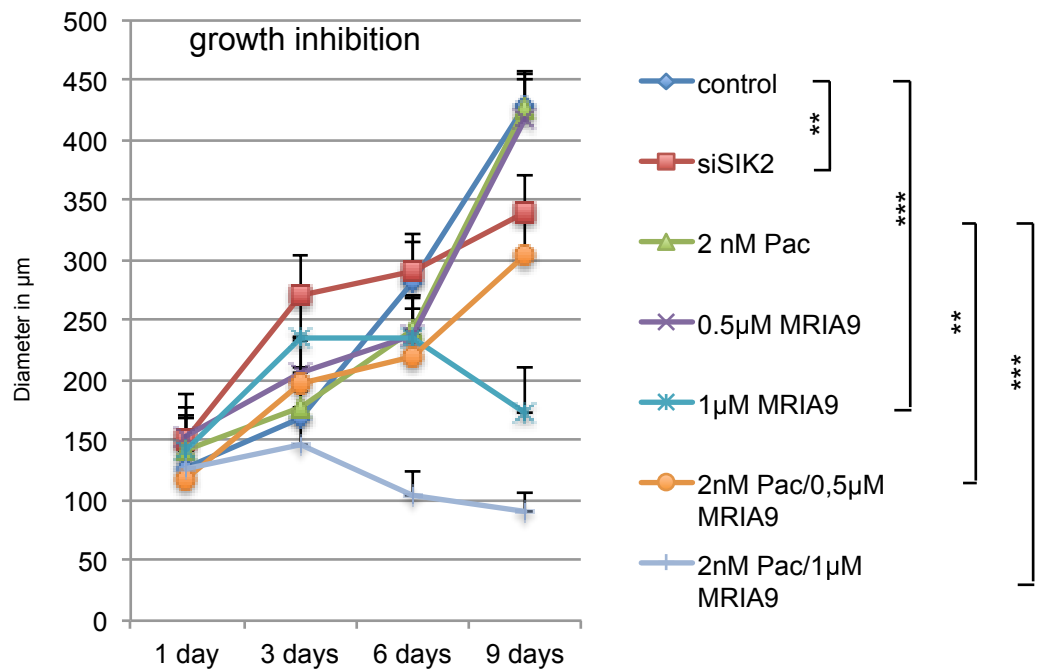

Supplement: s1 [file s1]

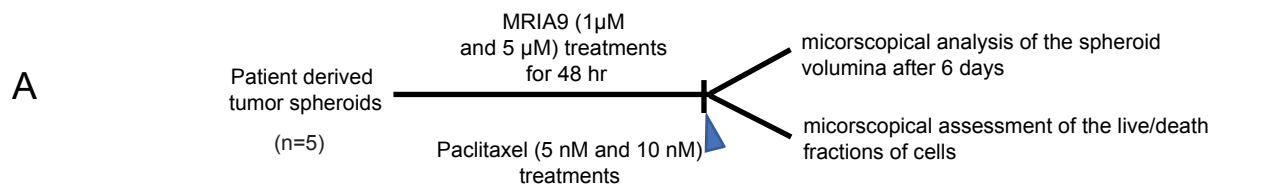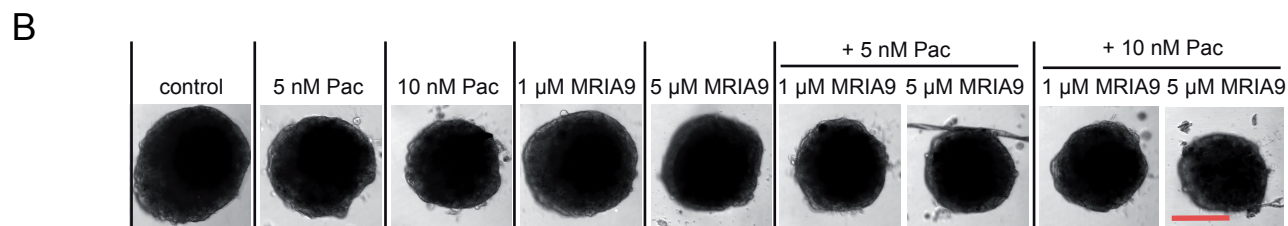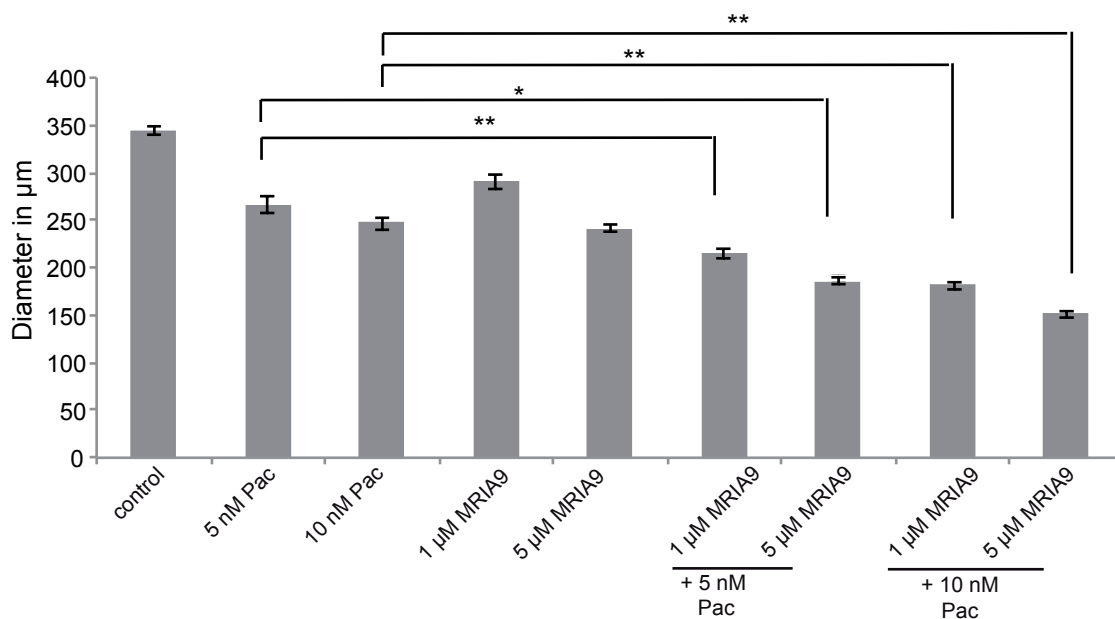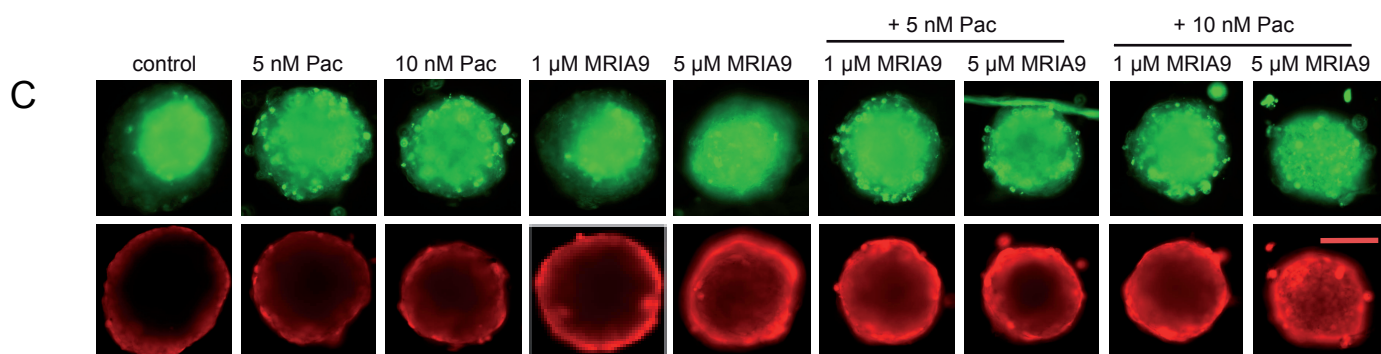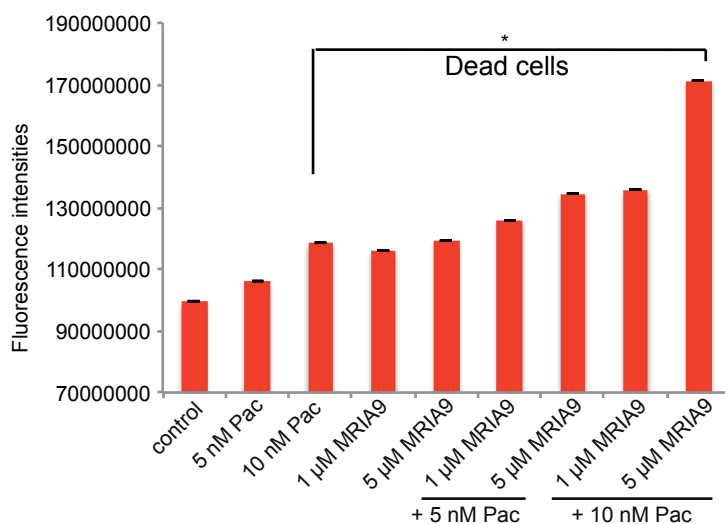

Supplement: s1 [file s1]

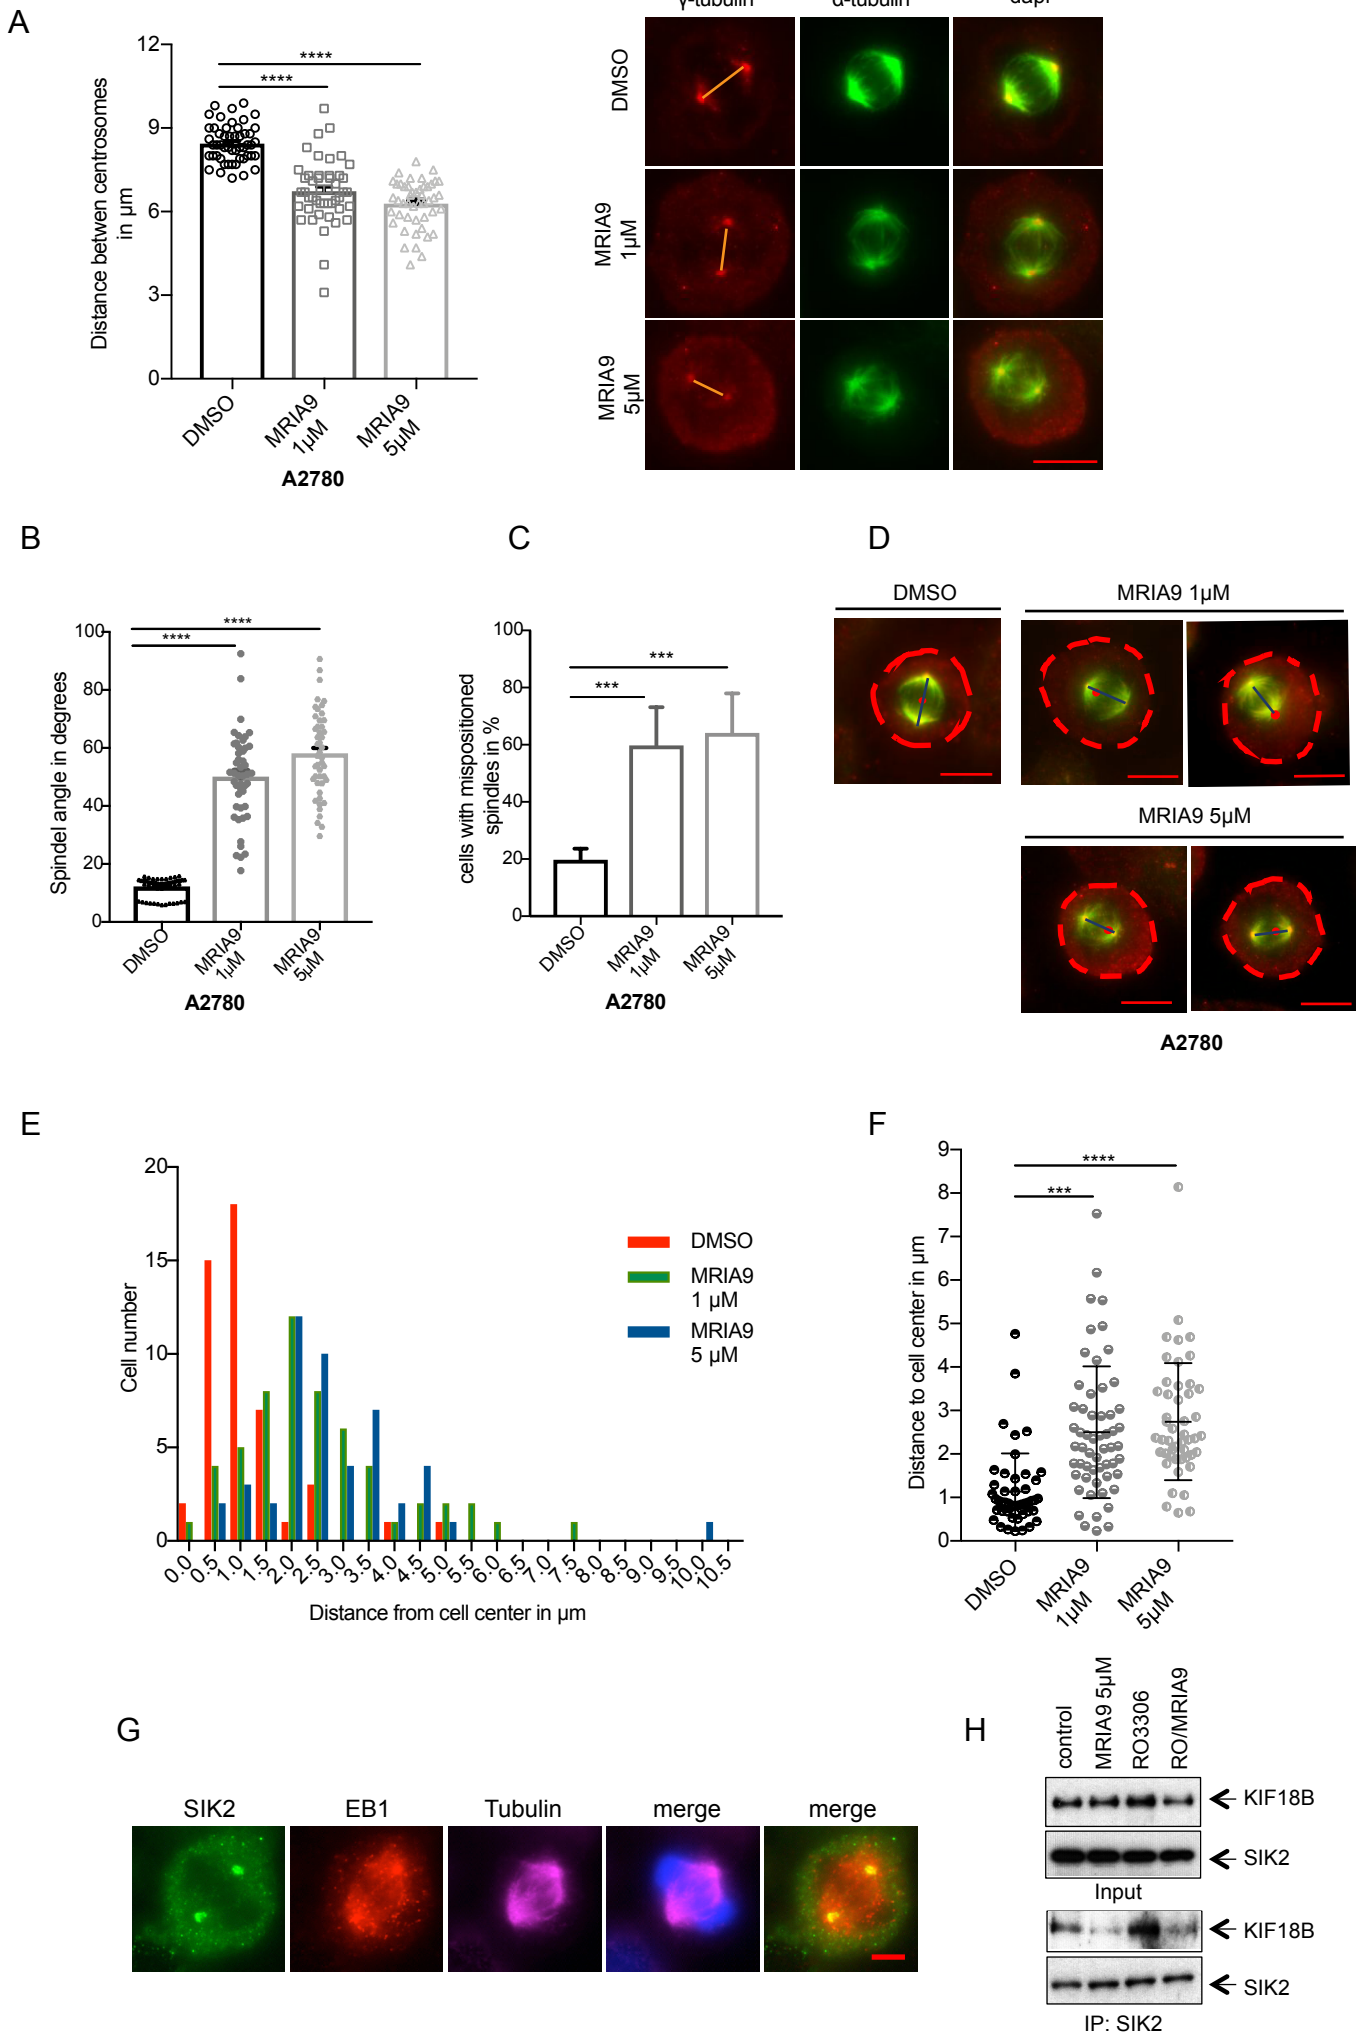

Supplement: s1 [file s1]

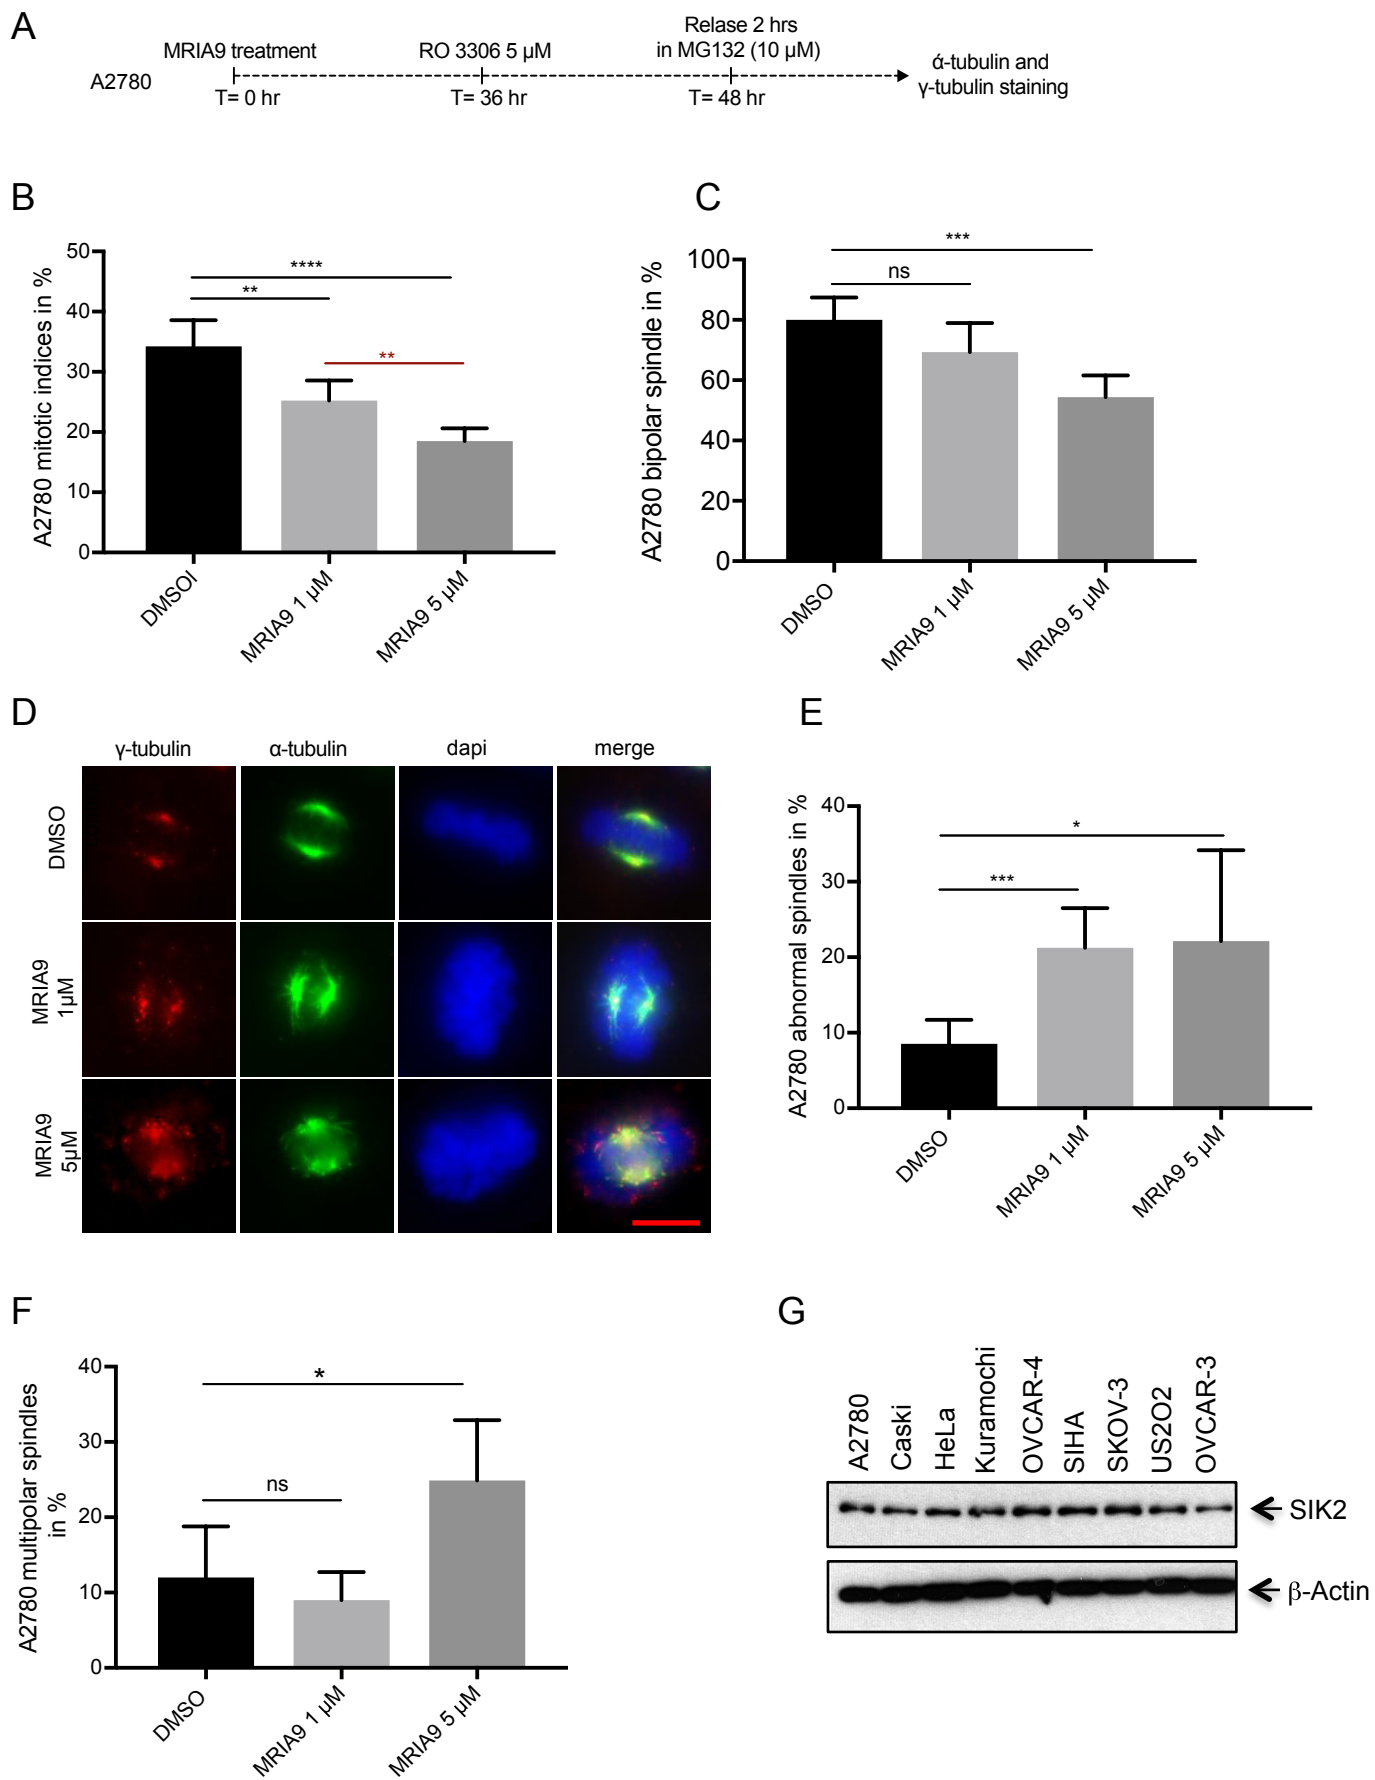

Supplement: s1 [file s1]
